# Supplementary material for: Optimal Investment Strategy Analysis of On‐Site Hydrogen Production Based on the Hydrogen Demand Prediction Using Machine Learning
Source: Hindawi journal article supplement (doi:10.1155/2024/6313421), 2024-01-01
Supplement: f1 [file 6313421.f1.zip]

Archive with 8 entries (8 files):
- FIGURE S1.pptx
- FIGURE S2.pptx
- FIGURE S3.pptx
- FIGURE S4.pptx
- FIGURE S5.pptx
- FIGURE S6.pptx
- FIGURE S7.pptx
- Supplementary_clean version_240207.docx
