# Supplementary material for: Optimal Investment Strategy Analysis of On‐Site Hydrogen Production Based on the Hydrogen Demand Prediction Using Machine Learning
Source: Hindawi journal article supplement (doi:10.1155/2024/6313421), 2024-01-01
Supplement: f1 [file 6313421.f1.zip › Supplementary_clean version_240207.docx]

**Electronic Supplementary Information:**

Optimal investment strategy analysis of on-site hydrogen production based on the hydrogen demand prediction using machine learning

*Hweeung Kwon1, Jinwoo Park2,*, Jae Eun Shin3,*, Bonchan Koo4,**

1Department of Nano Chemical Engineering, Soonchunhynag University, Asan-si, Chungcheongnam-do, 31538, Republic of Korea

2 Department of Chemical and Biochemical Engineering, Dongguk University, Seoul, 04620, Republic of Korea

3 Future Geo-Strategy Research Center, Korea Institute of Geoscience and Mineral Resources (KIGAM), Daejeon, 34132, Republic of Korea

4Department of Mechanical Engineering, Dong-A University, Busan 49315, Republic of Korea

* Corresponding author.

*Email address:* [b98265300@gmail.com](mailto:b98265300@gmail.com) (B. Koo).

* The three authors have the same contribution to this study.

FIGURE S1: Schematic block diagram of proposed representative system for hydrogen production.

FIGURE S2: Process flow diagram of SSHS process.

FIGURE S3: Process flow diagram of AAHS process.

FIGURE S4: Number of hydrogen production system with HRS based on the predicted hydrogen demand.

FIGURE S5: Optimal operation rate and storage tank management of three proposed HPPs for hydrogen production. ((a) ASHS, (b) SSHS, (c) AAHS).

FIGURE S6: Comparison of the cash flow for three proposed HPPs over operation period.

FIGURE S7: Comparison of CO2 emissions for SSHS and AAHS processes.

TABLE S1: Major descriptors to predict hydrogen demand.

| Number | Descriptor | | Description |
| --- | --- | --- | --- |
| 1 | Seoul | Car | Number of cars registered in Seoul |
| 2 | Bus | Number of buses registered in Seoul |
| 3 | Truck | Number of trucks registered in Seoul |
| 4 | Gyeonggi-do | Car | Number of cars registered in Gyeonggi-do |
| 5 | Bus | Number of buses registered in Gyeonggi-do |
| 6 | Truck | Number of trucks registered in Gyeonggi-do |
| 7 | Gangwon-do | Car | Number of cars registered in Gangwon-do |
| 8 | Bus | Number of buses registered in Gangwon-do |
| 9 | Truck | Number of trucks registered in Gangwon-do |
| 10 | Gyeongsangnam-do | Car | Number of cars registered in Gyeongsangnam-do |
| 11 | Bus | Number of buses registered in Gyeongsangnam-do |
| 12 | Truck | Number of trucks registered in Gyeongsangnam-do |
| 13 | Gyeongsangbuk-do | Car | Number of cars registered in Gyeongsangbuk-do |
| 14 | Bus | Number of buses registered in Gyeongsangbuk-do |
| 15 | Truck | Number of trucks registered in Gyeongsangbuk-do |
| 16 | Jeollanam-do | Car | Number of cars registered in Jeollanam-do |
| 17 | Bus | Number of buses registered in Jeollanam-do |
| 18 | Truck | Number of trucks registered in Jeollanam-do |
| 19 | Jeollabuk-do | Car | Number of cars registered in Jeollabuk-do |
| 20 | Bus | Number of buses registered in Jeollabuk-do |
| 21 | Truck | Number of trucks registered in Jeollabuk-do |
| 22 | Chungcheongnam-do | Car | Number of cars registered in Chungcheongnam-do |
| 23 | Bus | Number of buses registered in Chungcheongnam-do |
| 24 | Truck | Number of trucks registered in Chungcheongnam-do |
| 25 | Jeju-do | Car | Number of cars registered in Jeju-do |
| 26 | Bus | Number of buses registered in Jeju-do |
| 27 | Truck | Number of trucks registered in Jeju-do |
| 28 | Chungcheongbuk-do | Car | Number of cars registered in Chungcheongbuk-do |
| 29 | Bus | Number of buses registered in Chungcheongbuk-do |
| 30 | Truck | Number of trucks registered in Chungcheongbuk-do |
| 31 | Average mileage of FCEV | Car | Average mileage of cars |
| 32 | Taxi | Average mileage of taxis |
| 33 | Bus | Average mileage of buses |
| 34 | Truck | Average mileage of trucks |
| 35 | Number of FCEVs registered | Car | Number of cars (FCEV) registered |
| 36 | Taxi | Number of taxis (FCEV) registered |
| 37 | Bus | Number of buses (FCEV) registered |
| 38 | Truck | Number of trucks (FCEV) registered |
| 39 | Fuel efficiency | Car | Fuel efficiency of cars (FCEV) |
| 40 | Taxi | Fuel efficiency of taxis (FCEV) |
| 41 | Bus | Fuel efficiency of buses (FCEV) |
| 42 | Truck | Fuel efficiency of trucks (FCEV) |
| 43 | Daily fuel usage | Car | Daily fuel usage of cars (FCEV) |
| 44 | Taxi | Daily fuel usage of taxis (FCEV) |
| 45 | Bus | Daily fuel usage of buses (FCEV) |
| 46 | Truck | Daily fuel usage of trucks (FCEV) |
| 47 | Infrastructure installation trends | | Infrastructure installation trends (HRS) |
| 48 | By-product hydrogen production | petrochemical plant | By-product hydrogen production of petrochemical plant |
| 49 | refinery | By-product hydrogen production of refinery |
| 50 | Operating rate | petrochemical plant | Operating rate of petrochemical plant |
| 51 | refinery | Operating rate of refinery |
| 52 | Turn-around | petrochemical plant | Turn-around of petrochemical plant |
| 53 | refinery | Turn-around of refinery |
| 54 | supply trend of fuel cell | Power generation | Fuel cell supply trends used for power generation |
| 55 | Building | Fuel cell supply trends used for building |
| 56 | Trend of hydrogen energy usage | Transportation | Trend of hydrogen energy usage for transportation |
| 57 | Power generation | Trend of hydrogen energy usage for power generation |
| 58 | Building | Trend of hydrogen energy usage for Building |
| 59 | Hydrogen production based on the SMR | | Hydrogen production based on the SMR |
| 60 | Hydrogen production based on the electrolysis | | Hydrogen production based on the electrolysis |
| 61 | Future energy plan of government | Short-term | Future energy plan (short-term) of government |
| 62 | Mid-term | Future energy plan (mid-term) of government |
| 63 | Long-term | Future energy plan (long-term) of government |
| 64 | Future supply and demand plan for NG of government | Short-term | Future supply and demand plan (short-term) for NG of government |
| 65 | Mid-term | Future supply and demand plan (mid-term) for NG of government |
| 66 | Long-term | Future supply and demand plan (long-term) for NG of government |
| 67 | Future supply and demand plan of renewable energy | Short-term | Future supply and demand plan (short-term) for renewable energy of government |
| 68 | Mid-term | Future supply and demand plan (mid-term) for renewable energy of government |
| 69 | Long-term | Future supply and demand plan (long-term) for renewable energy of government |
| 70 | Future supply plan of green vehicles | Short-term | Future supply plan (short-term) for green vehicles of government |
| 71 | Mid-term | Future supply plan (mid-term) for green vehicles of government |
| 72 | Long-term | Future supply plan (long-term) for green vehicles of government |
| 73 | Own hydrogen consumption | petrochemical plant | Own hydrogen consumption of petrochemical plant |
| 74 | refinery | Own hydrogen consumption of refinery |

TABLE S2: Stream information of ASHS process.

|  | | 1 | 2 | 3 | 4 | 5 | 6 | 7 | 8 |  |
| --- | --- | --- | --- | --- | --- | --- | --- | --- | --- | --- |
| Temperature [℃] | | 25.0 | 25.2 | 25.0 | 24.6 | 25.0 | 500.0 | 750.0 | 300.0 |  |
| Pressure [bar] | | 21.0 | 21.0 | 21.0 | 21.0 | 21.0 | 20.8 | 20.6 | 20.4 |  |
| Total flow [kmol/hr] | | 10.6 | 21.2 | 1.9 | 29.9 | 13.7 | 13.7 | 13.5 | 21.0 |  |
| Composition | CH4 | 0.9443 | - | 0.9443 | 0.2741 | 0.2741 | 0.2741 | 0.2786 | 0.0002 |  |
| Heavy gas | 0.0539 | - | 0.0539 | 0.0157 | 0.0157 | 0.0157 | - | - |  |
| CO2 | - | - | - | - | - | - | - | - |  |
| CO | - | - | - | - | - | - | - | 0.1788 |  |
| H2O | - | 1.0000 | - | 0.7097 | 0.7097 | 0.7097 | 0.7214 | 0.2846 |  |
| H2 | - | - | - | - | - | - | - | 0.5364 |  |
| N2 | 0.0018 | - | 0.0018 | 0.0005 | 0.0005 | 0.0005 | - | - |  |
|  |  |  |  |  |  |  |  |  |  |  |
|  | | 9 | 10 | 11 | 12 | 13 | 14 | 15 | 16 | 17 |
| Temperature [℃] | | 200.0 | 25.0 | 1050.0 | 25.0 | 25.0 | 25.0 | 25.0 | 25.0 | 25.0 |
| Pressure [bar] | | 20.2 | 20.0 | 20.6 | 20.0 | 1.0 | 1.2 | 20.0 | 1.0 | 1.2 |
| Total flow [kmol/hr] | | 21.0 | 21.0 | 15.9 | 13.3 | 5.3 | 3.9 | 13.3 | 5.9 | 3.9 |
| Composition | CH4 | 0.0002 | 0.0002 | 0.2786 | - | 0.0007 | - | - | 0.1195 | - |
| Heavy gas | - | - | - | - | - | - | - | - | - |
| CO2 | 0.1570 | 0.1672 | - | - | 0.6658 | 1.0000 | - | 0.6015 | 1.0000 |
| CO | 0.0218 | 0.0116 | - | - | 0.0464 | - | - | 0.0247 | - |
| H2O | 0.1276 | 0.1175 | 0.7214 | - | 0.0064 | - | - | 0.0058 | - |
| H2 | 0.6934 | 0.7036 | - | 1.0000 | 0.2806 | - | 1.0000 | 0.2485 | - |
| N2 | - | - | - | - | - | - | - | - | - |

TABLE S3: Stream information of SSHS process.

|  | | 1 | 2 | 3 | 4 | 5 | 6 | 7 | 8 |  |
| --- | --- | --- | --- | --- | --- | --- | --- | --- | --- | --- |
| Temperature [℃] | | 25.0 | 25.2 | 25.0 | 24.6 | 25.0 | 500.0 | 750.0 | 300.0 |  |
| Pressure [bar] | | 21.0 | 21.0 | 21.0 | 21.0 | 21.0 | 20.8 | 20.6 | 20.4 |  |
| Total flow [kmol/hr] | | 9.9 | 20.8 | 1.9 | 28.8 | 14.4 | 14.4 | 14.2 | 21.7 |  |
| Composition | CH4 | 0.9443 | - | 0.9443 | 0.2610 | 0.2610 | 0.2610 | 0.2651 | 0.0002 |  |
| Heavy gas | 0.0539 | - | 0.0539 | 0.0149 | 0.0149 | 0.0149 | - | - |  |
| CO2 | - | - | - | - | - | - | - | - |  |
| CO | - | - | - | - | - | - | - | 0.1731 |  |
| H2O | - | 1.0000 | - | 0.7236 | 0.7236 | 0.7236 | 0.7349 | 0.3073 |  |
| H2 | - | - | - | - | - | - | - | 0.5194 |  |
| N2 | 0.0018 | - | 0.0018 | 0.0005 | 0.0005 | 0.0005 | - | - |  |
|  |  |  |  |  |  |  |  |  |  |  |
|  | | 9 | 10 | 11 | 12 | 13 | 14 | 15 | 16 | 17 |
| Temperature [℃] | | 200.0 | 25.0 | 750.0 | 25.0 | 25.0 | 40.0 | 25.0 | 25.0 | 40.0 |
| Pressure [bar] | | 20.2 | 20.0 | 20.6 | 20.0 | 1.0 | 1.2 | 20.0 | 1.0 | 1.2 |
| Total flow [kmol/hr] | | 21.7 | 21.7 | 14.2 | 13.3 | 5.3 | 3.9 | 13.3 | 5.3 | 3.9 |
| Composition | CH4 | 0.0002 | 0.0002 | 0.2651 | - | 0.0007 | - | - | 0.0007 | - |
| Heavy gas | - | - | - | - | - | - | - | - | - |
| CO2 | 0.1554 | 0.164 | - | - | 0.6742 | 1.0000 | - | 0.6742 | 1.0000 |
| CO | 0.0177 | 0.0091 | - | - | 0.0374 | - | - | 0.0374 | - |
| H2O | 0.1519 | 0.1433 | 0.7349 | - | 0.0064 | - | - | 0.0064 | - |
| H2 | 0.6748 | 0.6834 | - | 1.0000 | 0.2813 | - | 1.0000 | 0.2813 | - |
| N2 | - | - | - | - | - | - | - | - | - |

TABLE S4: Stream information of AAHS process.

|  | | 1 | 2 | 3 | 4 | 5 | 6 | 7 | 8 |  |
| --- | --- | --- | --- | --- | --- | --- | --- | --- | --- | --- |
| Temperature [℃] | | 25.0 | 25.2 | 25.0 | 24.6 | 25.0 | 500.0 | 1050.0 | 300.0 |  |
| Pressure [bar] | | 21.0 | 21.0 | 21.0 | 21.0 | 21.0 | 20.8 | 20.6 | 20.4 |  |
| Total flow [kmol/hr] | | 11.8 | 22.5 | 1.9 | 32.4 | 16.2 | 16.2 | 15.9 | 23.4 |  |
| Composition | CH4 | 0.9443 | - | 0.9443 | 0.2875 | 0.2875 | 0.2875 | 0.2786 | 0.0304 |  |
| Heavy gas | 0.0539 | - | 0.0539 | 0.0165 | 0.0165 | 0.0165 | - | - |  |
| CO2 | - | - | - | - | - | - | - | 0.0645 |  |
| CO | - | - | - | - | - | - | - | 0.0949 |  |
| H2O | - | 1.000 | - | 0.6955 | 0.6955 | 0.6955 | 0.7214 | 0.2675 |  |
| H2 | - | - | - | - | - | - | - | 0.5427 |  |
| N2 | 0.0018 | - | 0.0018 | 0.0005 | 0.0005 | 0.0005 | - | - |  |
|  |  |  |  |  |  |  |  |  |  |  |
|  | | 9 | 10 | 11 | 12 | 13 | 14 | 15 | 16 | 17 |
| Temperature [℃] | | 200.0 | 25.0 | 1050.0 | 25.0 | 25.0 | 40.0 | 25.0 | 25.0 | 40.0 |
| Pressure [bar] | | 20.2 | 20.0 | 20.6 | 20.0 | 1.0 | 1.2 | 20.0 | 1.0 | 1.2 |
| Total flow [kmol/hr] | | 23.4 | 23.4 | 15.9 | 13.3 | 5.9 | 3.9 | 13.3 | 5.9 | 3.9 |
| Composition | CH4 | 0.0304 | 0.0304 | 0.2786 | - | 0.1195 | - | - | 0.1195 | - |
| Heavy gas | - | - | - | - | - | - | - | - | - |
| CO2 | 0.1467 | 0.1531 | - | - | 0.6015 | 1.0000 | - | 0.6015 | 1.0000 |
| CO | 0.0127 | 0.0063 | - | - | 0.0247 | - | - | 0.0247 | - |
| H2O | 0.1853 | 0.1789 | 0.7214 | - | 0.0058 | - | - | 0.0058 | - |
| H2 | 0.6249 | 0.6313 |  | 1.0000 | 0.2485 | - | 1.0000 | 0.2485 | - |
| N2 | - | - | - | - | - | - | - | - | - |

TABLE S5: The lower and upper bound values of the storage tank and operation rates of SMR. and ATR.

|  | Lower bound | Upper bound |
| --- | --- | --- |
|  | 0 | 90 |
|  | 40 | 100 |
|  | 0 | 100 |
